# Supplementary material
Source: PubMed Central journal article supplement (PMC11181362)
Supplement: media-1.pdf [file media-1.pdf]

**Single cell regulatory architecture of human pancreatic islets suggests sex differences in  $\beta$  cell function and the pathogenesis of type 2 diabetes.**

Mirza Muhammad Fahd Qadir<sup>1,2,3</sup>, Ruth M. Elgama<sup>4,5</sup>, Keijing Song<sup>6</sup>, Parul Kudtarkar<sup>5</sup>, Siva S.V.P Sakamuri<sup>7</sup>, Prasad V. Katakam<sup>7</sup>, Samir El-Dahr<sup>8</sup>, Jay Kolls<sup>6</sup>, Kyle J. Gaulton<sup>5</sup>, Franck Mauvais-Jarvis<sup>1,2,3,10</sup>,

<sup>1</sup>Section of Endocrinology and Metabolism, John W. Deming Department of Medicine, Tulane University School of Medicine, New Orleans, LA, USA

<sup>2</sup>Southeast Louisiana Veterans Health Care System, New Orleans, LA, USA

<sup>3</sup>Tulane Center of Excellence in Sex-Based Biology & Medicine, New Orleans, LA, USA

<sup>4</sup>Biomedical Sciences Graduate Program, University of California, San Diego, La Jolla, CA, USA

<sup>5</sup>Department of Pediatrics, University of California, San Diego, La Jolla, CA, USA

<sup>6</sup>Center for Translational Research in Infection and Inflammation, John W. Deming Department of Medicine, Tulane University School of Medicine, New Orleans, LA, USA

<sup>7</sup>Department of Pharmacology, Tulane University School of Medicine, New Orleans, LA, USA

<sup>8</sup>Department of Pediatrics, Tulane University, School of Medicine, New Orleans, LA, USA

<sup>10</sup>Lead contact: [fmauvais@tulane.edu](mailto:fmauvais@tulane.edu)

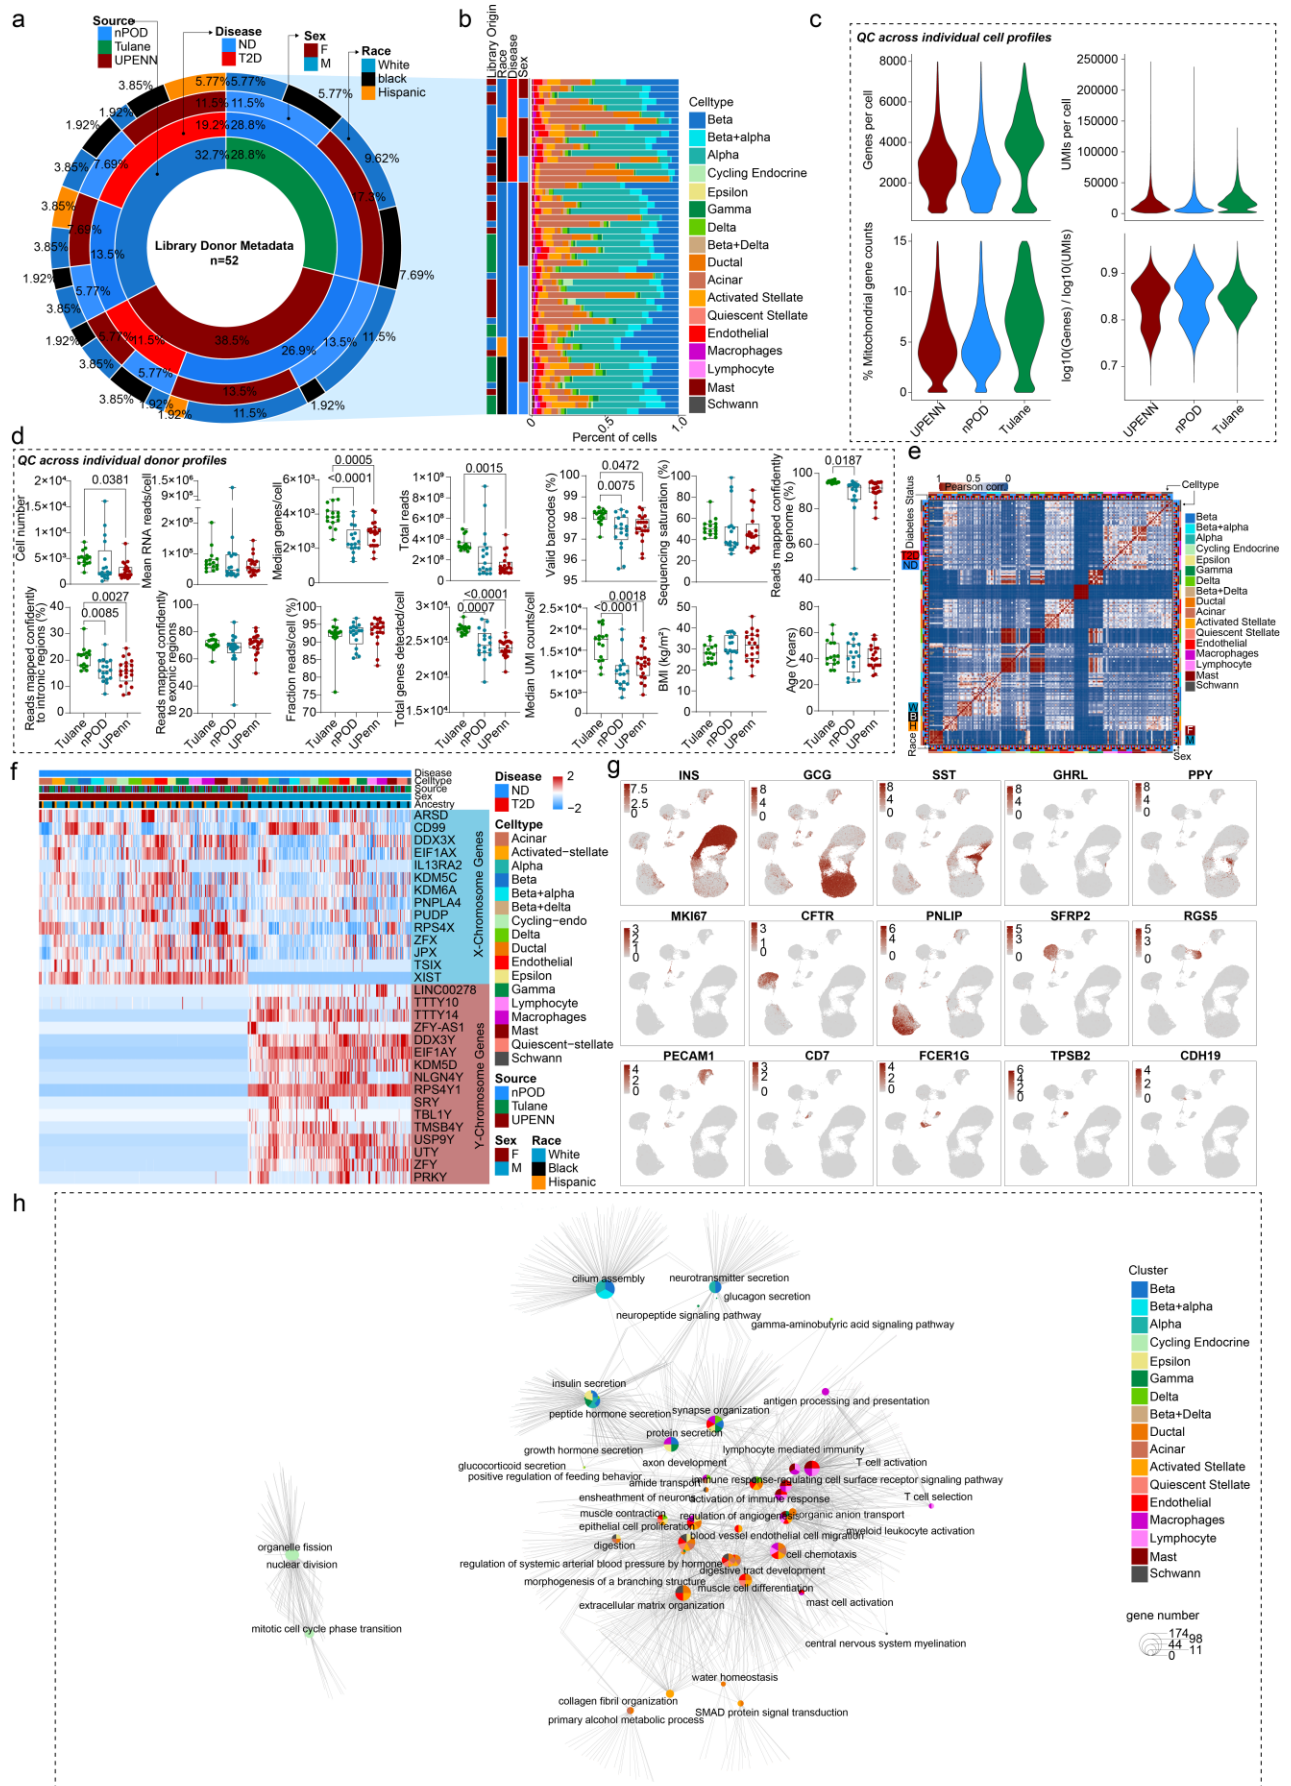

Extended Data Fig.1 Donor metadata, scRNAseq quality control metrics and network analysis of all non-diabetic cell cells.

**a**, Sunburst plot showing donor metadata of scRNAseq datasets used in this study. n=52 donors from Tulane University and the Human Pancreas Analysis Program (HPAP). Metadata is organized into source, disease status, sex, and race across all donor profiles. **b**, Percentage distribution across all 17 cell clusters for each of the n=52 donors used in this study. Cells are colored based on a key (legend) and metadata is organized based on information shown in **(a)**. **c**, Violin plots showing genes expressed per cell, unique molecular identifiers (UMIs) per cell, percentage mitochondrial genes and library complexity [ $\log_{10}(\text{number of genes})/\log_{10}(\text{number of UMIs})$ ] across each of the donor sources. **d**, Quality control metrics for cell number, mean RNA reads/cell, median genes/cell, total reads, valid barcodes, sequencing saturation, percentage of reads mapped confidently to the reference genome, reads mapped confidently to intronic regions, reads mapped confidently to exonic regions, fraction of reads/cell, total genes detected/cell, median UMI counts/cell, basal metabolic index and age, across all donors split on the basis of source. **e**, Pearson's correlation between normalized read coverage within a merged set of RNAseq expression profiles across 52 donors. Annotation bars highlight the sex, race, cell type and diabetes status of the donors. **f**, Heatmap showing normalized aggregated RNAseq expression profiles for select Y and X linked chromosome genes across race, sex, source, celltype and disease. **g**, UMAP plots showing RNAseq expression profiles for select cognate genes across each cell type specific cell cluster. **h**, Gene ontology network analysis showing regulated pathways across all non-diabetic islet cells. Size of circle equivalent to gene contribution. **(d)**  $p < 0.05$  is significant **(h)** FDR adjusted  $p < 0.2$  is significant. n = 52 donors

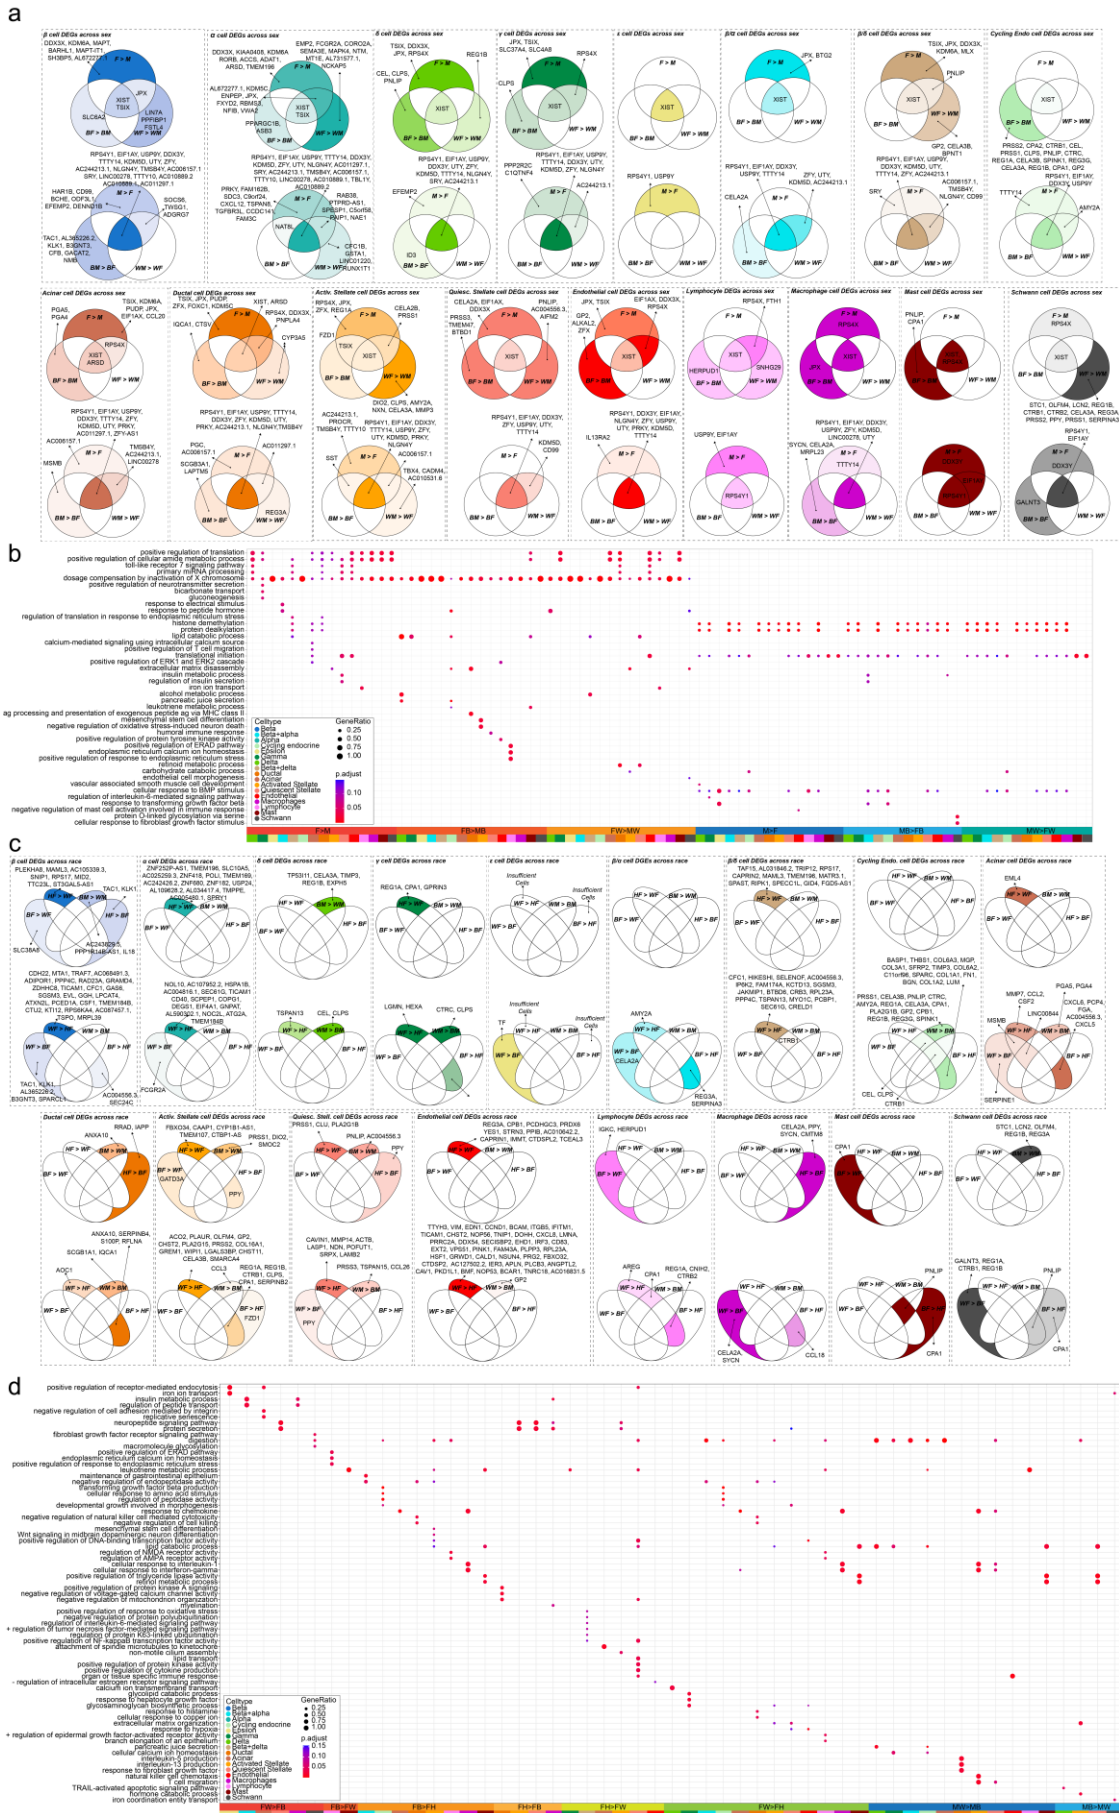

**Extended Data Fig.2 Differentially expressed genes and pathways in human islet cells across sex and race.**

**a**, Venn diagrams showing differentially expressed genes (DEGs) across sex in case of non-diabetic: beta, alpha, delta, gamma, beta+alpha, beta+delta, cycling endo, acinar, ductal, activated stellate, quiescent stellate, endothelial, lymphocyte, macrophage, mast and schwann cells. **b**, Gene ontology (GO) analysis of celltypes other than  $\alpha/\beta$  shown in **(a)**. **c**, Venn diagrams showing differentially expressed genes (DEGs) across ancestry for cells highlighted in **(a)**. **d**, Gene ontology (GO) analysis of all celltypes other than  $\alpha/\beta$  shown in **(c)**. DGE: FDR adjusted pval < 0.1 is significant, GO: FDR adjusted pval < 0.2 is significant, n = 36 (non-diabetic).



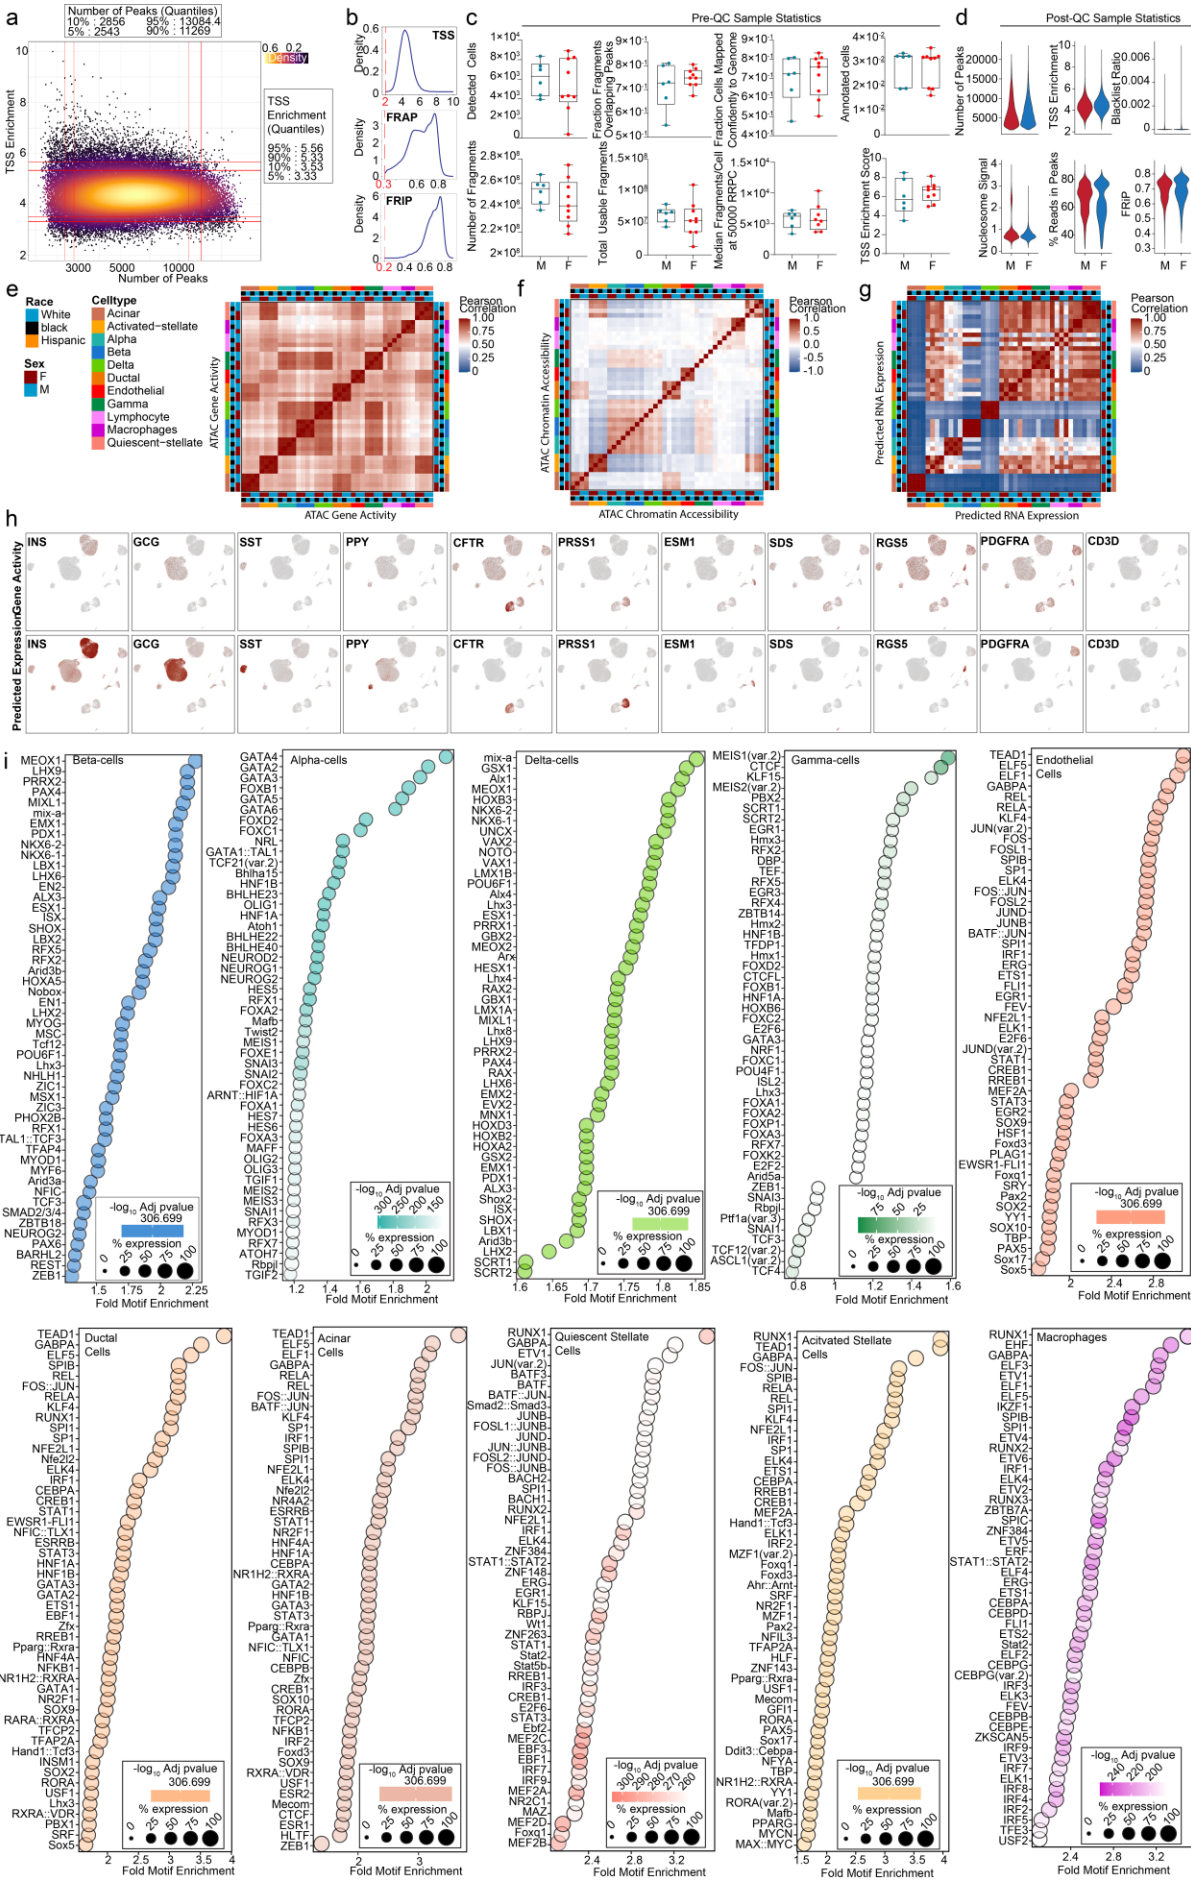

Extended Data Fig.3 snATACseq quality control metrics and network analysis of all non-diabetic cells.

**a**, Density scatter showing transcriptional start site (TSS) enrichment on y-axis and number of peak counts on the x-axis. **b**, QC plots showing TSS, fragment reads in accessible peaks (FRAP) and fragment reads in promoters (FRIP) across all donors. Dashed red line signifies cutoff. **c**, QC plots showing metrics for detected cells, fraction fragments overlapping peaks, fraction cells mapped confidently to genome, annotated cells, number of fragments, total usable fragments, median fragments/cell at 50K raw reads/cell (RRPC) and TSS enrichment score across all donors. **d**, Post-filtering QC metrics showing number of peaks, TSS enrichment, blacklist ratio, nucleosome signal, percentage reads in peaks and FRIP across all donors. **e**, Pearson's correlation between aggregated read coverage from snATACseq experiments. **f**, Pearson's' correlation between aggregated gene activity from snATACseq experiments. **g**, Pearson's' correlation between aggregated predicted RNA expression in snATACseq experiments based on mapped expression models from scRNAseq experiments. **h**, Gene activity based on accessibility in 100kb windows flanking select cognate genes across cell clusters (top row). Predicted gene expression based on expression data mapping from scRNAseq atlas (bottom row). **i**, Differential analysis using chromVAR and the JASPAR 2020 motif database showing enriched motifs for beta, delta, alpha, gamma, ductal, acinar, quiescent stellate, activated stellate, endothelial and macrophage cells. DGE: FDR adjusted pval < 0.05 is significantly enriched. n = 15 non-diabetics.

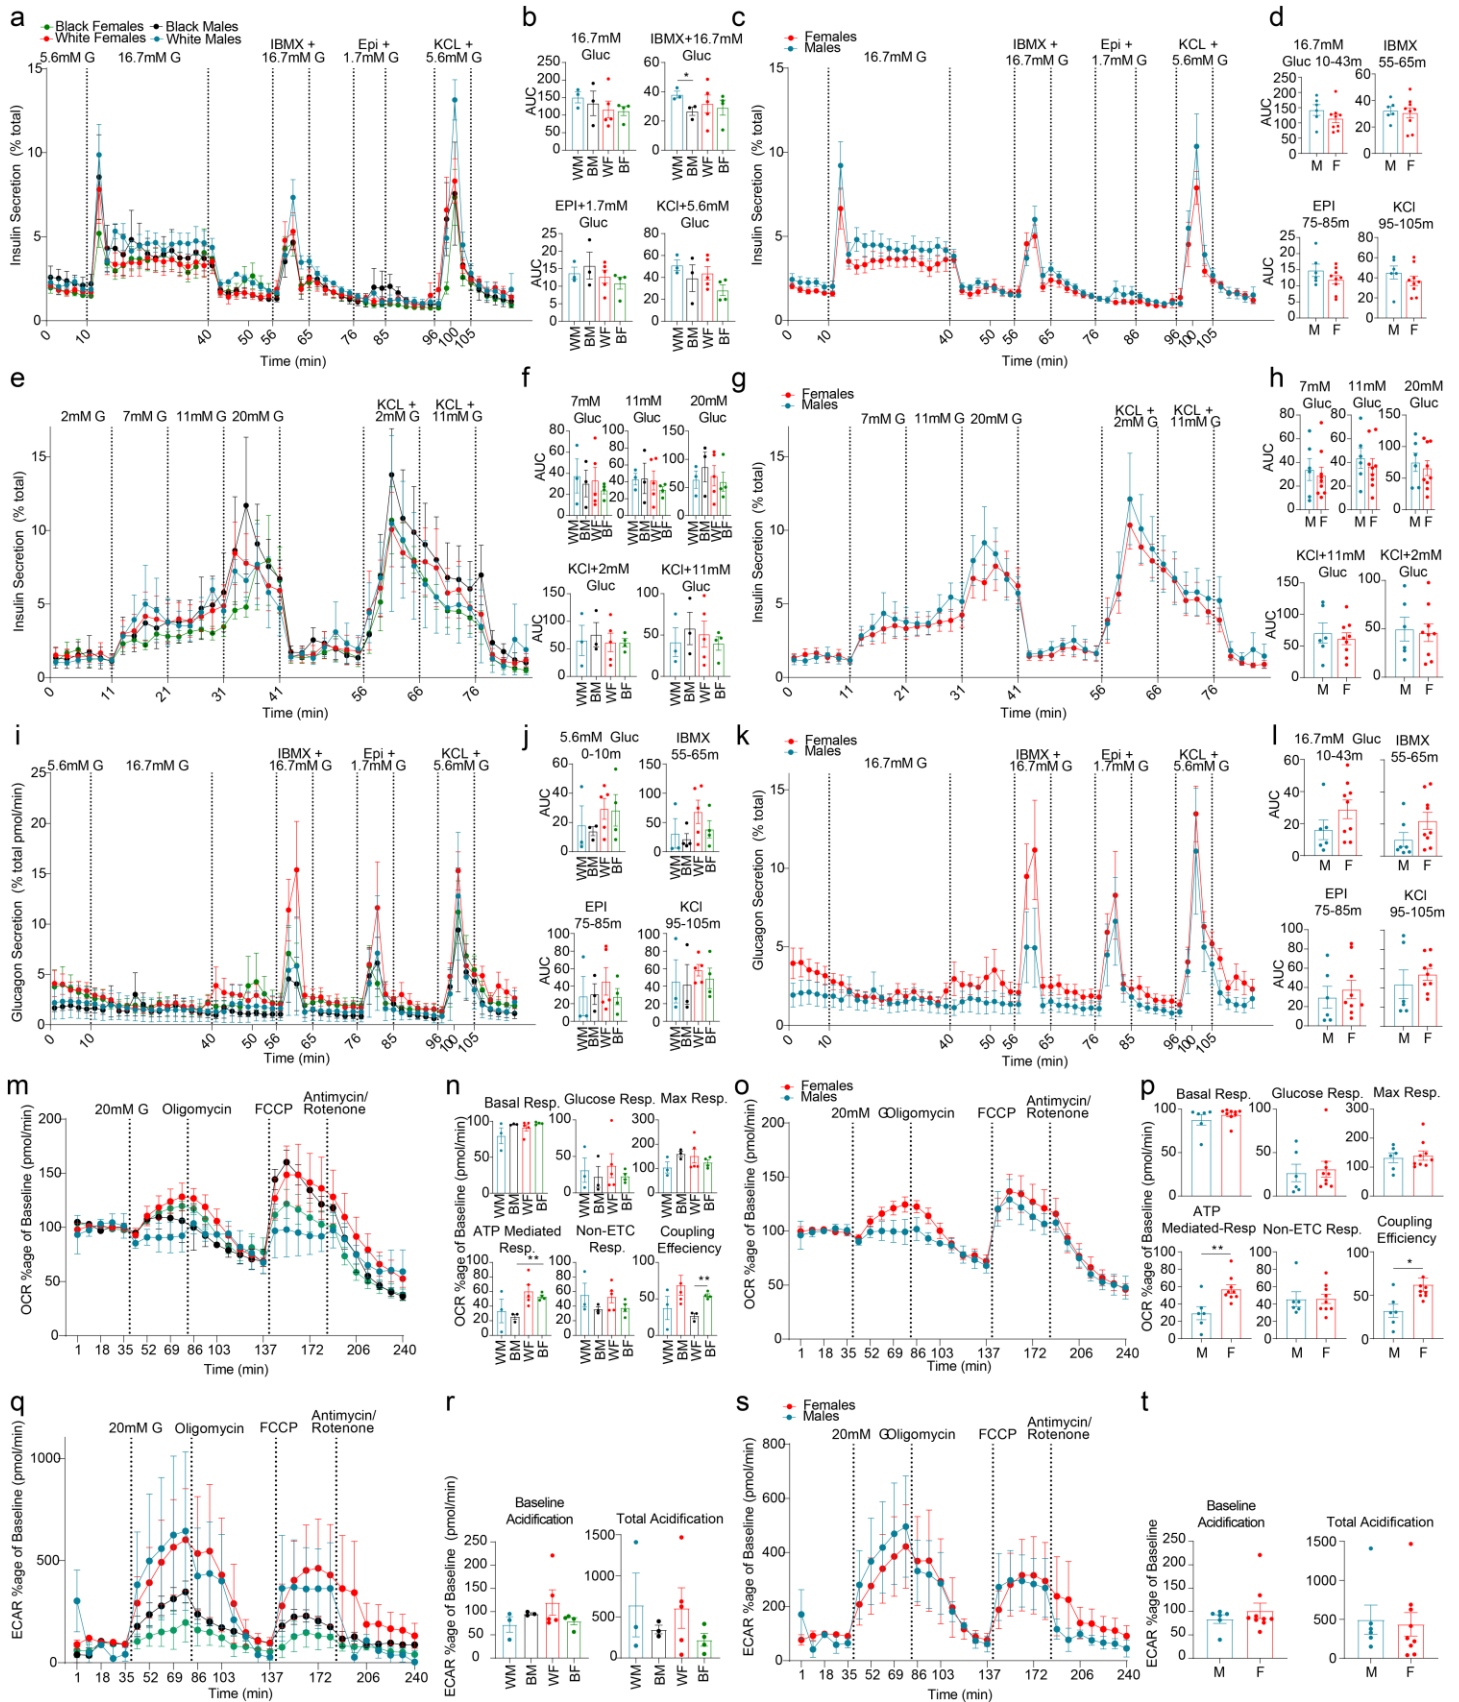

### Extended Data Fig.4 Dynamic insulin and glucagon secretion coupled with islet bioenergetics.

**a**, Dynamic insulin secretion assay, showing response to 16.7mM glucose, IBMX + 16.7mM Glucose, epinephrine + 1.7mM Glucose and potassium chloride + 5.6mM glucose. Each curve represents secretion normalized to total insulin content across sex and race. **b**, Area under the curve (AUC) measurements for incretin driven insulin secretion measurements outlined in (a). **c**, Dynamic insulin secretion assay, showing response to 16.7mM glucose, IBMX + 16.7mM Glucose, epinephrine + 1.7mM Glucose and potassium chloride + 5.6mM



glucose. Each curve represents secretion normalized to total insulin content across sex. **d**, Area under the curve (AUC) measurements for incretin driven insulin secretion measurements outlined in **(b)**. **e**, Dynamic insulin secretion assay using an ascending glucose ramp. Stimulation modes show response to 7mM glucose, 11mM Glucose, 20mM Glucose, potassium chloride + 2mM glucose and, potassium chloride + 11mM glucose. Each curve represents secretion normalized to total insulin content across sex and race. **f**, Area under the curve (AUC) measurements for incretin driven insulin secretion measurements outlined in **(e)**. **g**, Dynamic insulin secretion assay using an ascending glucose ramp. Stimulation modes show response to 7mM glucose, 11mM Glucose, 20mM Glucose, potassium chloride + 2mM glucose and, potassium chloride + 11mM glucose. Each curve represents secretion normalized to total insulin content across sex and race. **h**, Area under the curve (AUC) measurements for incretin driven insulin secretion measurements outlined in **(g)**. **i**, Dynamic glucagon secretion assay, showing response to 16.7mM glucose, IBMX + 16.7mM Glucose, epinephrine + 1.7mM Glucose and potassium chloride + 5.6mM glucose. Each curve represents secretion normalized to total glucagon content across sex and race. **j**, Area under the curve (AUC) measurements for incretin driven insulin secretion measurements outlined in **(i)**. **k**, Dynamic glucagon secretion assay, showing response to 16.7mM glucose, IBMX + 16.7mM Glucose, epinephrine + 1.7mM Glucose and potassium chloride + 5.6mM glucose. Each curve represents secretion normalized to total glucagon content across sex. **l**, Area under the curve (AUC) measurements for incretin driven insulin secretion measurements outlined in **(k)**. **m**, Oxygen consumption ratio for islets across sex and race. **n**, Basal respiration, glucose mediated respiration, maximal (max) respiration, ATP mediated respiration, non-electron transport chain (ETC) respiration and coupling efficiency, across sex and race. **o**, Oxygen consumption ratio for islets across sex. **l**, Basal respiration, glucose mediated respiration, maximal (max) respiration, ATP mediated respiration, non-electron transport chain (ETC) respiration and coupling efficiency, of human islets across sex. **q**, Extracellular acidification rate for islets across sex and race. **r**, Baseline acidification and total acidification of human islets across sex and race. **s**, Extracellular acidification rate for islets across sex. **t**, Baseline acidification and total acidification of human islets across sex. \*pval < 0.05, \*\*pval < 0.01 is significant. n = 15 (non-diabetic).

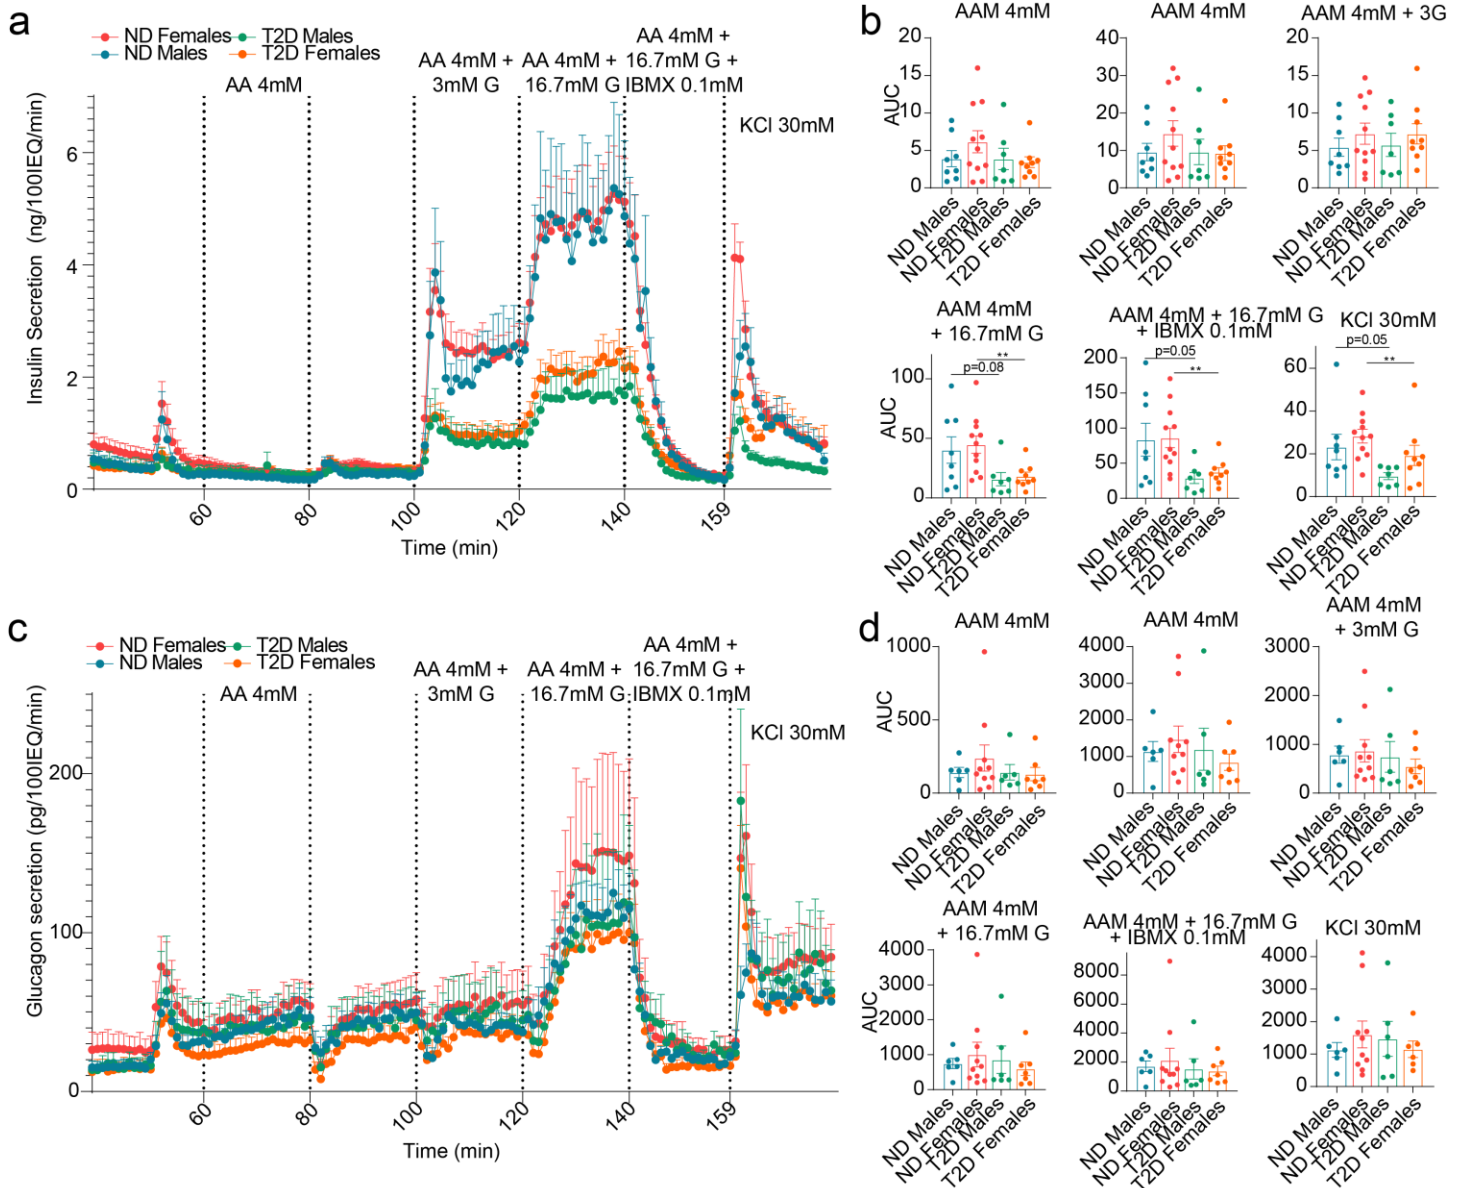

### Extended Data Fig.5 Dynamic hormone secretion profiles of HPAP type 2 diabetic donors.

**a**, Dynamic insulin secretion assay of human islets subject to Amino acid cocktail (AA) 4mM, AA 4mM + 3mM Glucose, AA 4mM +16.7mM glucose, AA 4mM + 16.7mM Glucose + IBMX 0.1mM and KCl 30mM. Each curve represents mean of each donor type across sex and disease. **b**, Area under the curve for insulin secretion at baseline, AA 4mM, AA 4mM + 3mM Glucose, AA 4mM +16.7mM glucose, AA 4mM + 16.7mM Glucose + IBMX 0.1mM and KCl 30mM. **c**, Dynamic glucagon secretion assay of human islets subject to secretagogues as in **(a)**. **d**, Area under the curve for glucagon secretion like **(a)**. Data analyzed from HPAP dataset. n= 21 non-diabetic and n=16 T2D diabetic donors. \*\*pvalue < 0.01

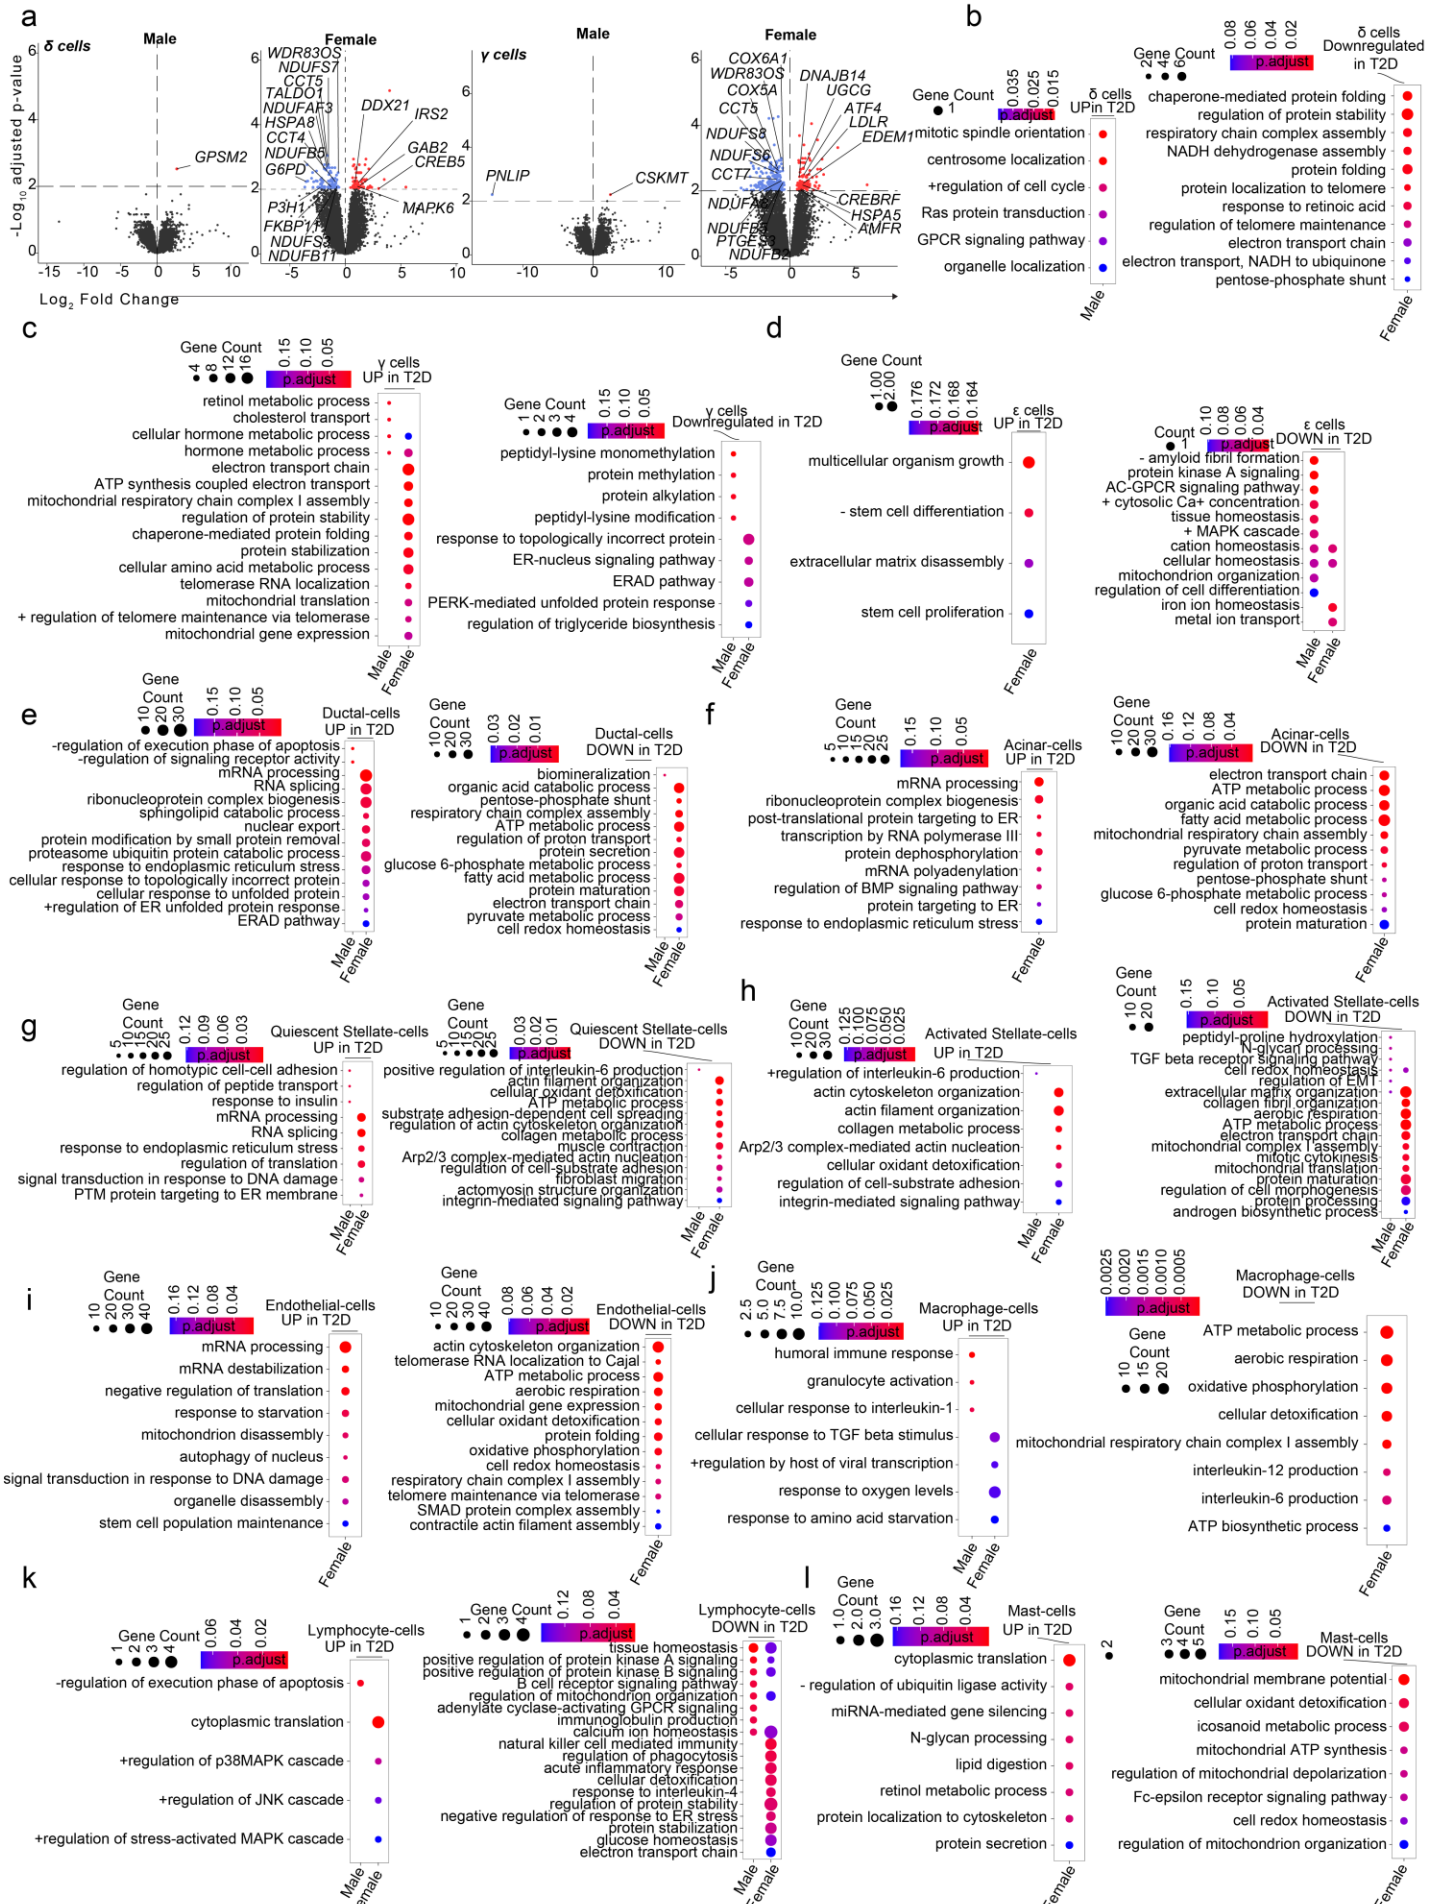

**a-h**, Gene ontology plots highlighting upregulated and downregulated pathways in T2D across sex. Pathways compare type two diabetic males to non-diabetic males and similarly for females. Data is shown for: **a**, Ductal cells; **b**, Acinar cells; **c**, Quiescent stellate cells. **d**, Activated stellate cells; **e**, Endothelial cells; **f**, Macrophage cells; **g**, Lymphocyte cells; **h**, Mast cells. DGE: FDR adjusted pval < 0.1 is significant, GO: FDR adjusted pval < 0.2 is significant, n = 36 (non-diabetic) and n = 16 T2D.
